# Supplementary material for: Rapid genome wide mapping of phosphine resistance loci by a simple regional averaging analysis in the red flour beetle, Tribolium castaneum
Source: PubMed Central journal article supplement (PMC3849015; doi:10.1186/1471-2164-14-650), 2013-09-24
Supplement: 1471-2164-14-650-S2.pdf [file 1471-2164-14-650-S2.pdf]

# Average frequency of primary variant (%)

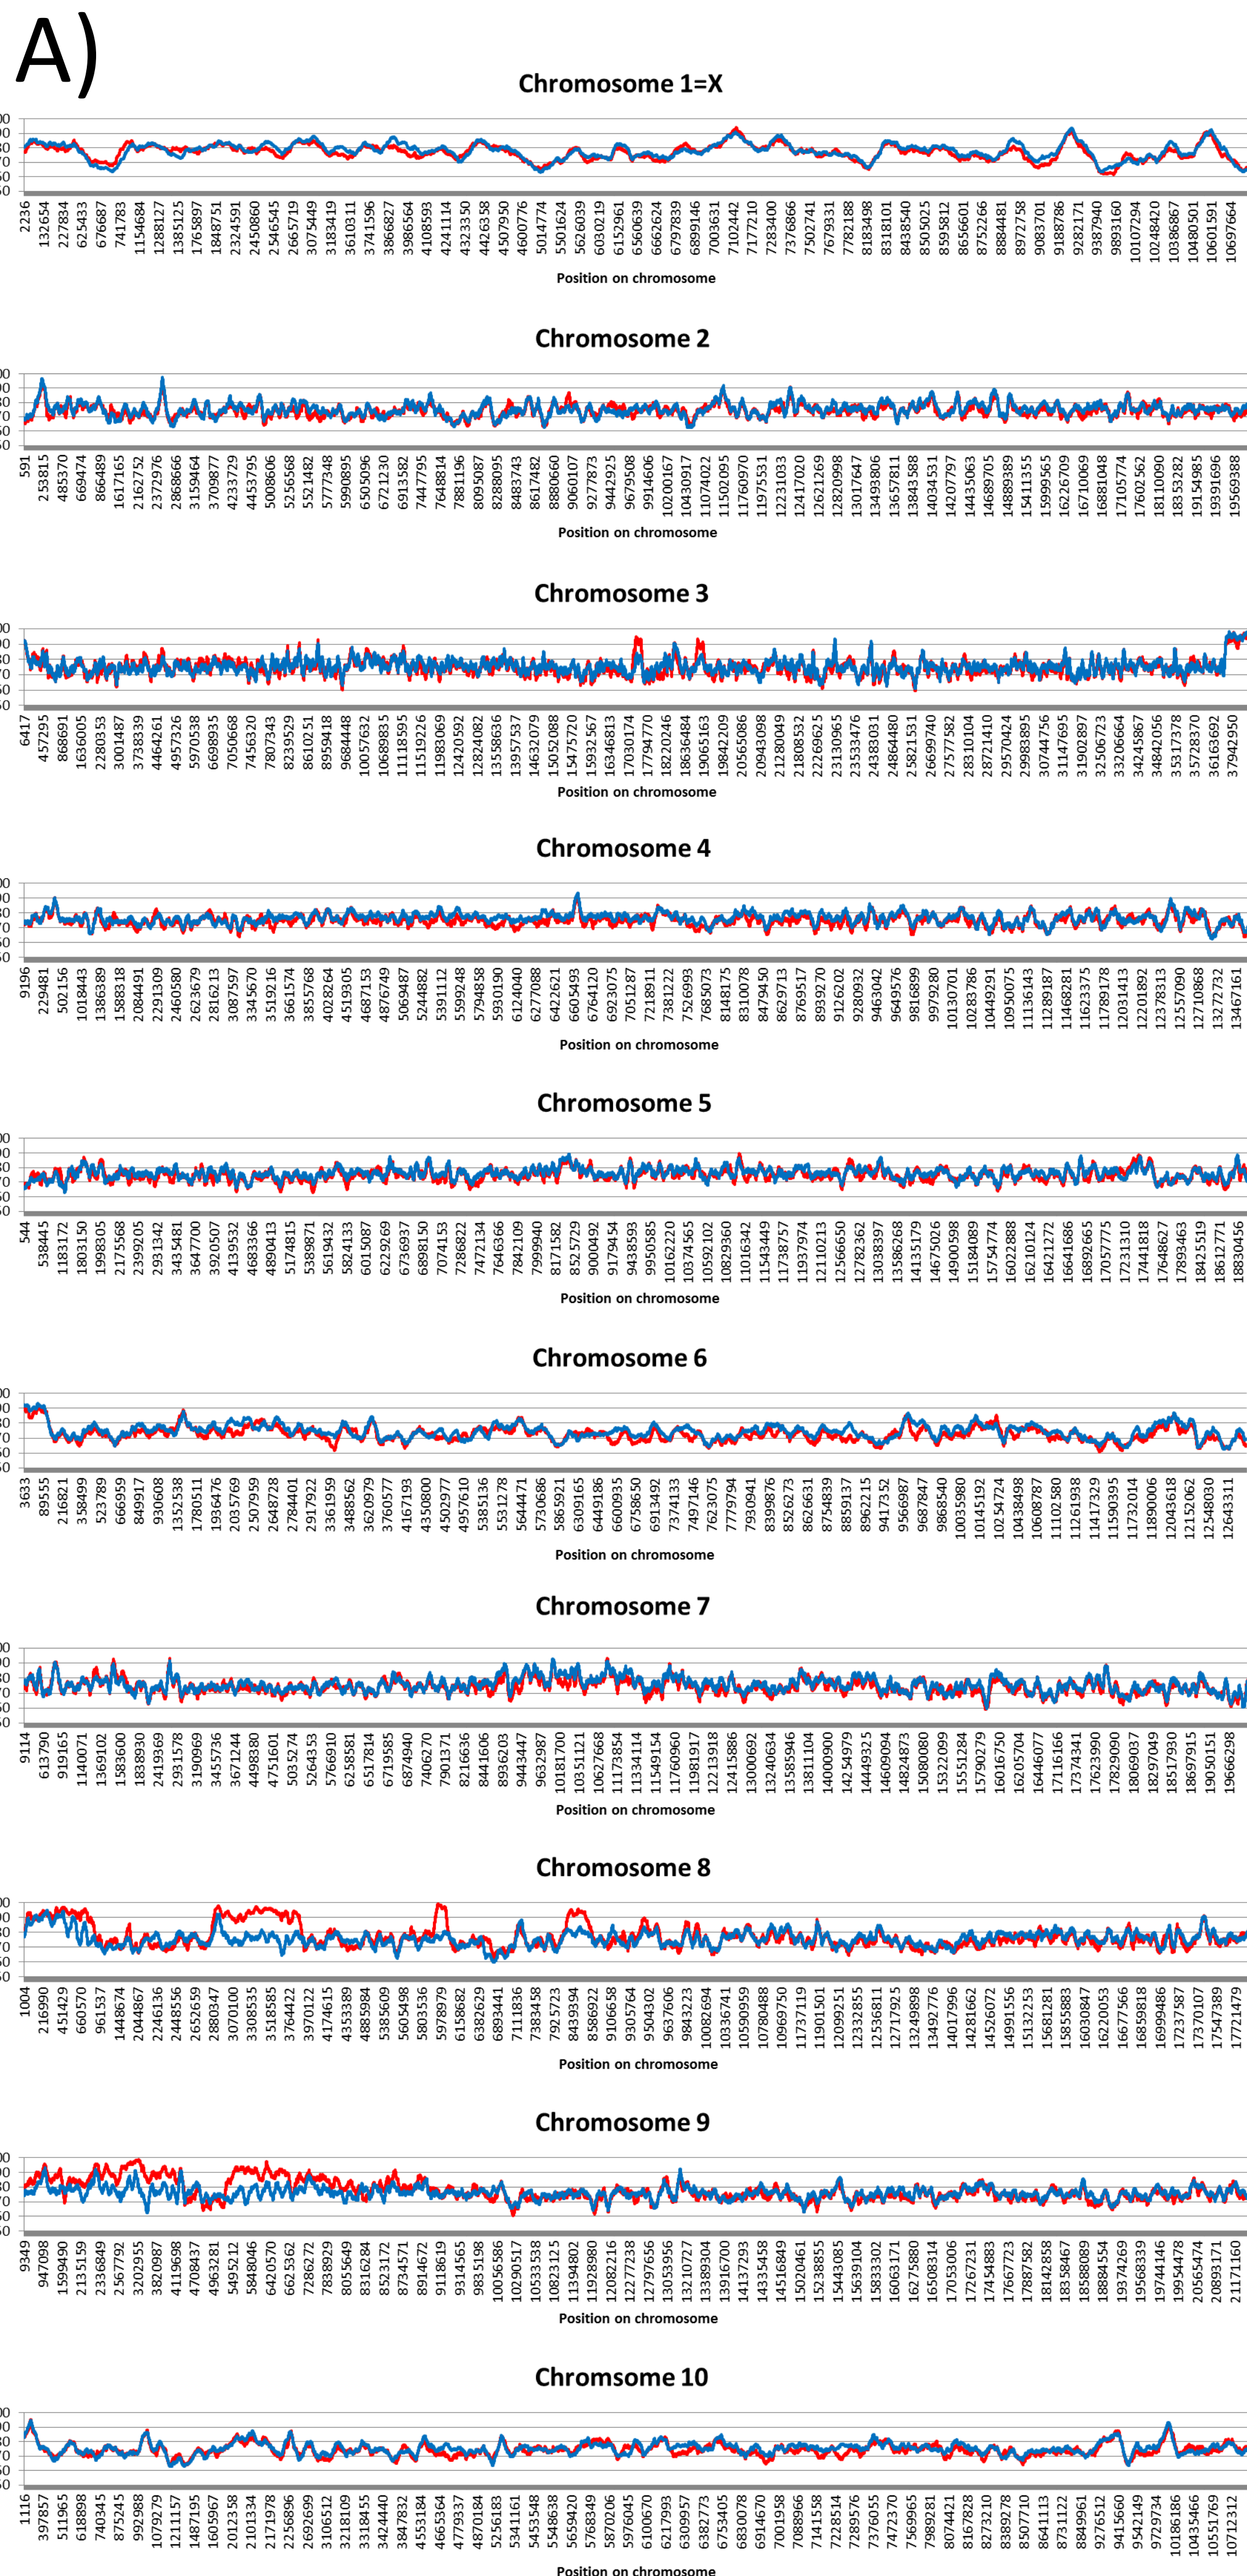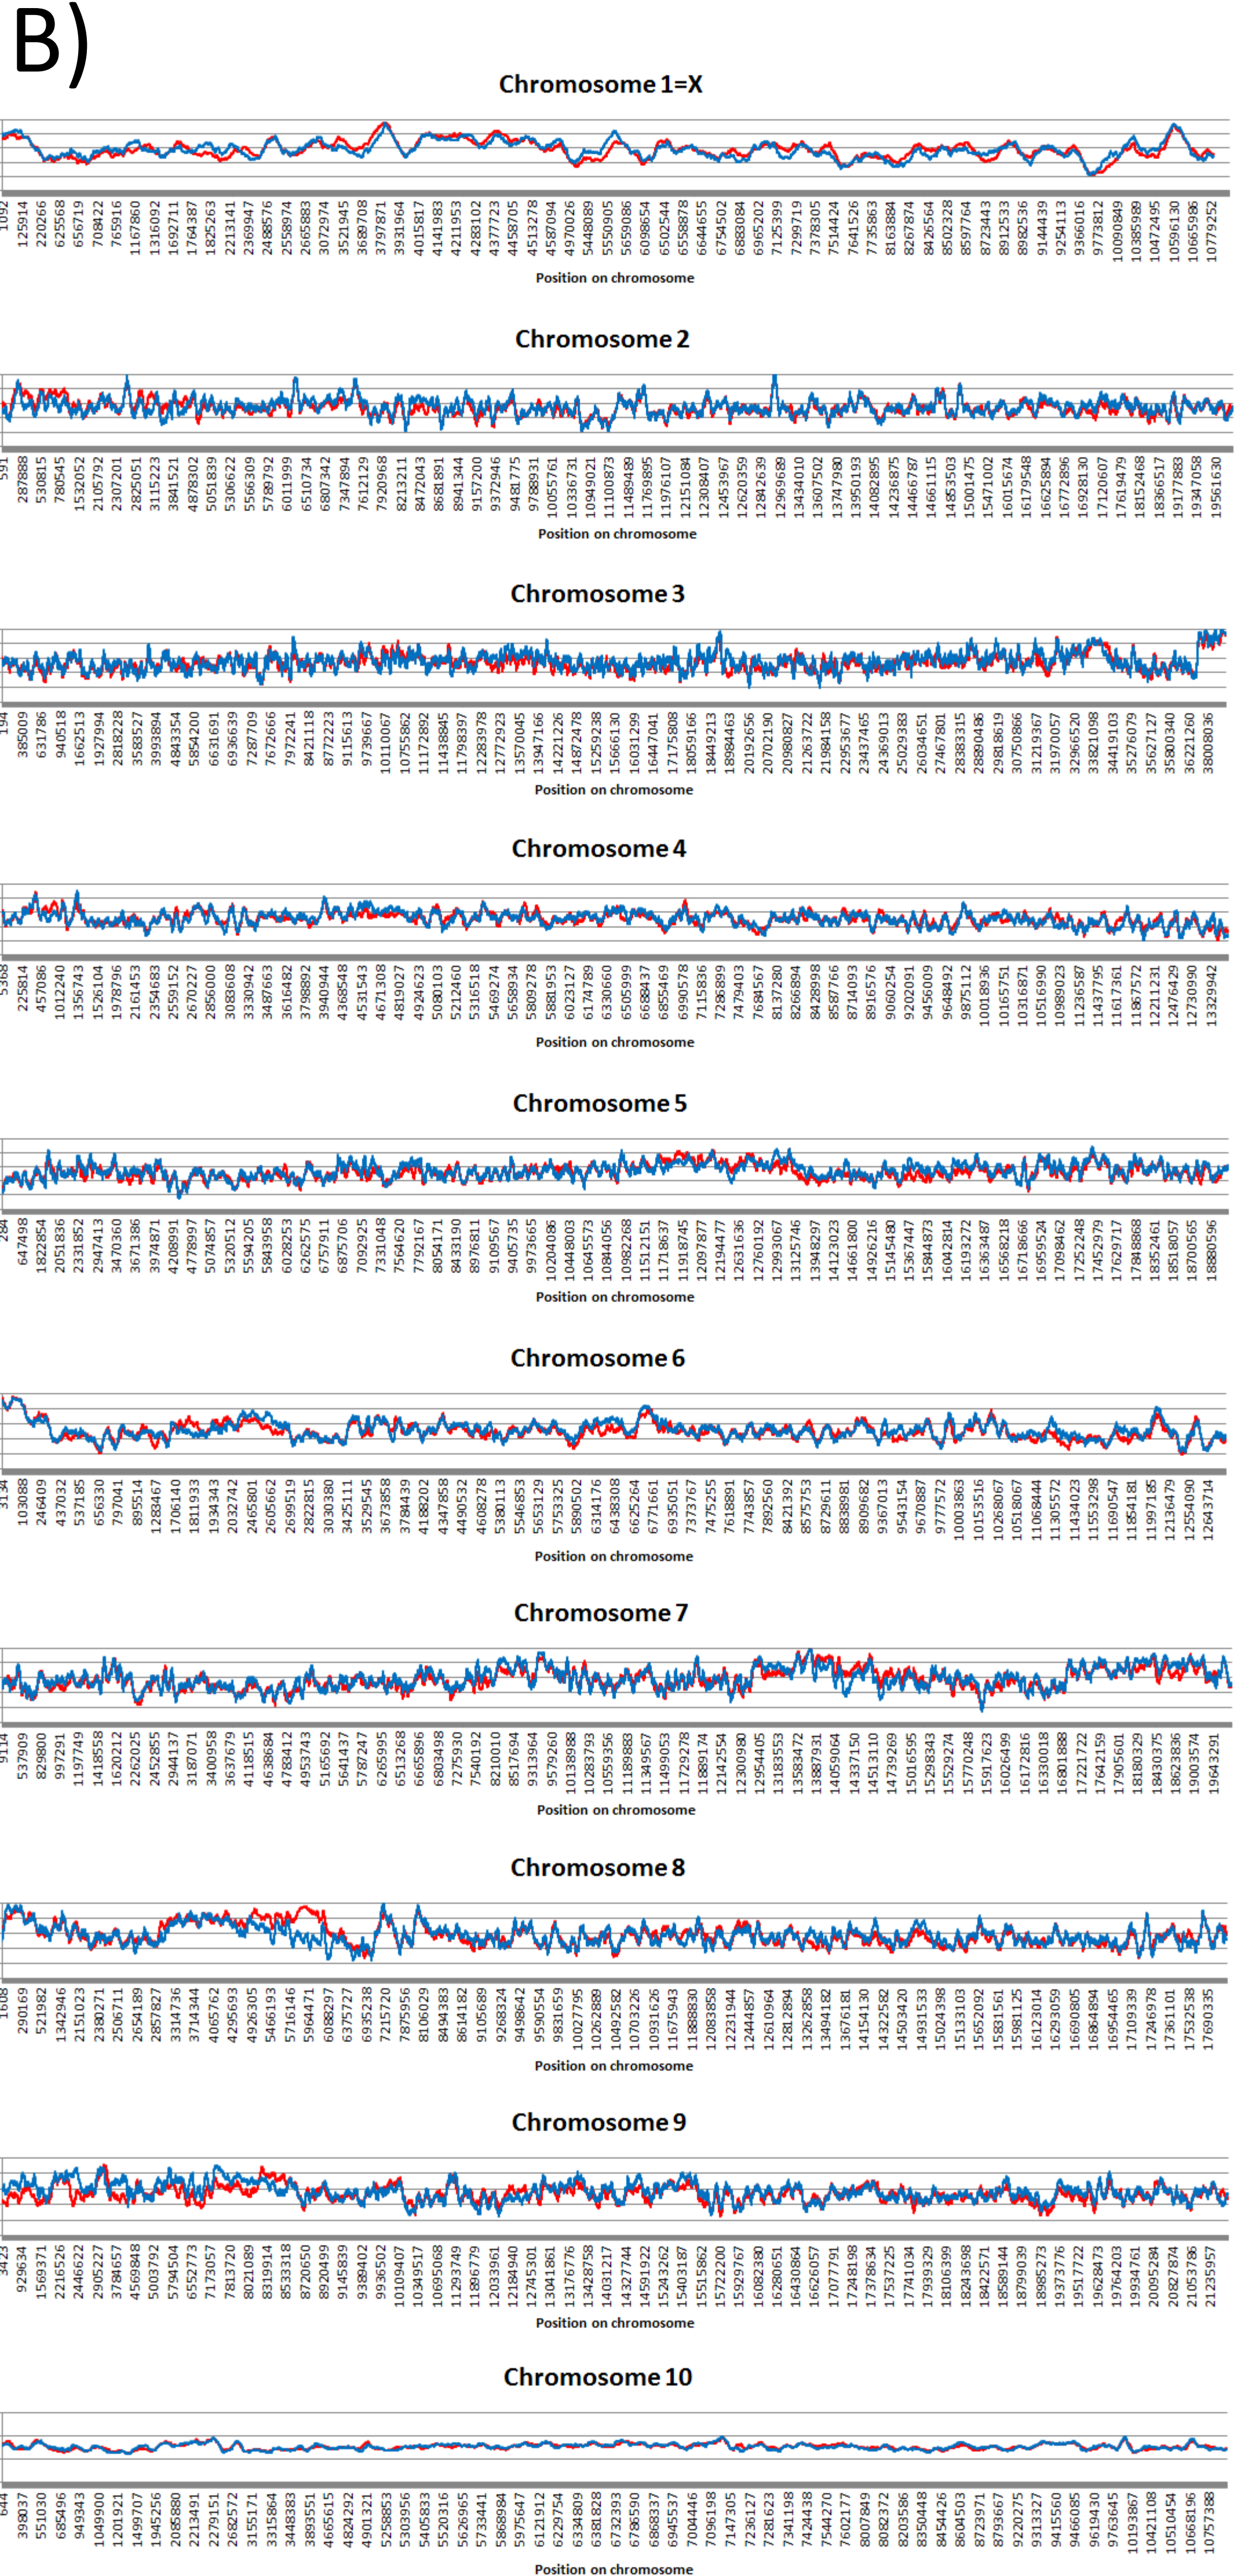

Selected Unselected
